# Supplementary material
Source: PubMed Central journal article supplement (PMC4873443)
Supplement: NIHMS763617-supplement-Supplemental.pdf [file NIHMS763617-supplement-Supplemental.pdf]

| SPINE DENSITIES [ $\mu\text{m}^{-1}$ ] |         |                   |          |           |           |          |                        |                  |                                                 |                                                 |                                                       |                                                       |            |            |
|----------------------------------------|---------|-------------------|----------|-----------|-----------|----------|------------------------|------------------|-------------------------------------------------|-------------------------------------------------|-------------------------------------------------------|-------------------------------------------------------|------------|------------|
| Brain region                           | Stratum | Culture condition | Genotype | Construct | Treatment | Mice (n) | Dendritic segments (n) | Mean $\pm$ s.e.m | One way ANOVA (All culture time, both genotype) | Post hoc (I) p values (n.tg versus APP.tg)      | Post hoc (I) p values (versus P7DIV20, same genotype) | Post hoc (I) p values (versus P14DIV20 same genotype) |            |            |
| CA1                                    | rad.    | P7DIV15           | n.tg     | EGFP-Tau  | /         | $\geq 4$ | 13                     | 1.24 $\pm$ 0.09  | <b>F (5,73) = 14.70</b><br><b>p &lt; 0.0001</b> | <b>p = 0.0063</b>                               | p = 0.9910                                            | p = 0.9872                                            |            |            |
|                                        |         |                   | APP.tg   | EGFP-Tau  | /         | $\geq 4$ | 15                     | 0.9 $\pm$ 0.08   |                                                 |                                                 | p = 0.6842                                            | p = 0.2757                                            |            |            |
|                                        |         | P7DIV20           | n.tg     | EGFP-Tau  | /         | $\geq 4$ | 11                     | 1.18 $\pm$ 0.09  |                                                 | <b>F (5,46) = 8.131</b><br><b>p &lt; 0.0001</b> | <b>p = 0.0015</b>                                     |                                                       | p = 0.8211 |            |
|                                        |         |                   | APP.tg   | EGFP-Tau  | /         | $\geq 4$ | 12                     | 0.76 $\pm$ 0.05  |                                                 |                                                 |                                                       |                                                       | p = 0.9900 |            |
|                                        |         | P14DIV20          | n.tg     | EGFP-Tau  | /         | $\geq 4$ | 15                     | 1.3 $\pm$ 0.04   |                                                 |                                                 | <b>F (5,57) = 7.545</b><br><b>p &lt; 0.0001</b>       | <b>p &lt; 0.0001</b>                                  |            |            |
|                                        |         |                   | APP.tg   | EGFP-Tau  | /         | $\geq 4$ | 13                     | 0.7 $\pm$ 0.04   |                                                 |                                                 |                                                       |                                                       |            |            |
|                                        | or.     | P7DIV15           | n.tg     | EGFP-Tau  | /         | $\geq 4$ | 6                      | 0.94 $\pm$ 0.15  | <b>F (5,94) = 19.28</b><br><b>p &lt; 0.0001</b> |                                                 |                                                       | p = 0.9988                                            | p = 0.9984 | p = 0.0601 |
|                                        |         |                   | APP.tg   | EGFP-Tau  | /         | $\geq 4$ | 6                      | 0.88 $\pm$ 0.08  |                                                 |                                                 |                                                       |                                                       | p = 0.7244 | p = 0.9302 |
|                                        |         | P7DIV20           | n.tg     | EGFP-Tau  | /         | $\geq 4$ | 8                      | 1 $\pm$ 0.12     |                                                 | <b>F (5,94) = 19.28</b><br><b>p &lt; 0.0001</b> |                                                       | p = 0.1876                                            |            | p = 0.0978 |
|                                        |         |                   | APP.tg   | EGFP-Tau  | /         | $\geq 4$ | 7                      | 0.67 $\pm$ 0.05  |                                                 |                                                 |                                                       |                                                       |            | p = 0.9894 |
|                                        |         | P14DIV20          | n.tg     | EGFP-Tau  | /         | $\geq 4$ | 14                     | 1.32 $\pm$ 0.06  |                                                 |                                                 | <b>F (5,94) = 19.28</b><br><b>p &lt; 0.0001</b>       | <b>p &lt; 0.0001</b>                                  |            |            |
|                                        |         |                   | APP.tg   | EGFP-Tau  | /         | $\geq 4$ | 11                     | 0.75 $\pm$ 0.09  |                                                 |                                                 |                                                       |                                                       |            |            |

| Brain region | Stratum    | Culture condition | Genotype | Construct | Treatment | Mice (n)        | Dendritic segments (n)                           | Mean $\pm$ s.e.m                                 | One way ANOVA (Untreated both genotypes together with DAPT treated both genotypes) | Post hoc (I) p values (n.tg versus APP.tg)       | Post hoc (I) p values (versus Tau-EGFP DAPT treated, same genotype) |                      |            |  |
|--------------|------------|-------------------|----------|-----------|-----------|-----------------|--------------------------------------------------|--------------------------------------------------|------------------------------------------------------------------------------------|--------------------------------------------------|---------------------------------------------------------------------|----------------------|------------|--|
| CA1          | rad. + or. | P7DIV15           | n.tg     | EGFP-Tau  | /         | $\geq 4$        | 15                                               | 1.29 $\pm$ 0.08                                  | <b>F (3,49) = 11.64</b><br><b>p &lt; 0.0001</b>                                    | <b>p &lt; 0.0001</b>                             | p = 0.9971                                                          | p = 0.9974           |            |  |
|              |            |                   | APP.tg   | EGFP-Tau  | /         | $\geq 4$        | 11                                               | 0.85 $\pm$ 0.1                                   |                                                                                    |                                                  | p = 0.9933                                                          | p = 0.6738           |            |  |
|              |            | P7DIV20           | n.tg     | EGFP-Tau  | /         | $\geq 4$        | 19                                               | 1.25 $\pm$ 0.06                                  |                                                                                    | <b>F (3,101) = 19.50</b><br><b>p &lt; 0.0001</b> | <b>p &lt; 0.0001</b>                                                |                      | p > 0.9999 |  |
|              |            |                   | APP.tg   | EGFP-Tau  | /         | $\geq 4$        | 25                                               | 0.8 $\pm$ 0.04                                   |                                                                                    |                                                  |                                                                     |                      | p = 0.8420 |  |
|              |            | P14DIV20          | n.tg     | EGFP-Tau  | /         | $\geq 4$        | 17                                               | 1.25 $\pm$ 0.05                                  |                                                                                    |                                                  | <b>F (3,101) = 19.50</b><br><b>p &lt; 0.0001</b>                    | <b>p &lt; 0.0001</b> |            |  |
|              |            |                   | APP.tg   | EGFP-Tau  | /         | $\geq 4$        | 13                                               | 0.7 $\pm$ 0.05                                   |                                                                                    |                                                  |                                                                     |                      |            |  |
| or.          | P7DIV15    | n.tg              | EGFP-Tau | /         | $\geq 4$  | 6               | 1.15 $\pm$ 0.08                                  | <b>F (3,101) = 19.50</b><br><b>p &lt; 0.0001</b> | p = 0.2689                                                                         |                                                  |                                                                     | p = 0.5664           | p = 0.9003 |  |
|              |            | APP.tg            | EGFP-Tau | /         | $\geq 4$  | 6               | 0.8 $\pm$ 0.15                                   |                                                  |                                                                                    |                                                  |                                                                     | p = 0.9954           | p = 0.9718 |  |
|              | P7DIV20    | n.tg              | EGFP-Tau | /         | $\geq 4$  | 8               | 1.4 $\pm$ 0.04                                   |                                                  | <b>F (3,101) = 19.50</b><br><b>p &lt; 0.0001</b>                                   | <b>p = 0.0085</b>                                |                                                                     |                      | p = 0.9428 |  |
|              |            | APP.tg            | EGFP-Tau | /         | $\geq 4$  | 7               | 0.88 $\pm$ 0.07                                  |                                                  |                                                                                    |                                                  |                                                                     |                      | p > 0.9999 |  |
| P14DIV20     | n.tg       | EGFP-Tau          | /        | $\geq 4$  | 16        | 1.29 $\pm$ 0.06 | <b>F (3,101) = 19.50</b><br><b>p &lt; 0.0001</b> | <b>p = 0.0015</b>                                |                                                                                    |                                                  |                                                                     |                      |            |  |
|              | APP.tg     | EGFP-Tau          | /        | $\geq 4$  | 20        | 0.9 $\pm$ 0.08  |                                                  |                                                  |                                                                                    |                                                  |                                                                     |                      |            |  |

| Brain region | Stratum | Culture condition | Genotype | Construct | Treatment | Mice (n)        | Dendritic segments (n)                       | Mean $\pm$ s.e.m | One way ANOVA (EGFP-Tau treated both genotypes together with EGFP treated both genotypes) | Post hoc (I) p values (n.tg versus APP.tg)   | Post hoc (I) p values (versus EpoD treated EGFP, same genotype) | One way ANOVA (EGFP-Tau treated both genotypes together with EGFP-Tau untreated both genotypes, same culture time from Fig 1C) | Post hoc (I) p values (versus EGFP-Tau untreated) |            |
|--------------|---------|-------------------|----------|-----------|-----------|-----------------|----------------------------------------------|------------------|-------------------------------------------------------------------------------------------|----------------------------------------------|-----------------------------------------------------------------|--------------------------------------------------------------------------------------------------------------------------------|---------------------------------------------------|------------|
| CA1          | rad.    | P7DIV15           | n.tg     | EGFP-Tau  | EpoD      | 5               | 31                                           | 1.23 $\pm$ 0.05  | <b>F (3,83) = 3.073</b><br><b>p = 0.0322</b>                                              | p = 0.9509                                   | p = 0.1714                                                      | <b>F (3,73) = 5.871</b><br><b>p = 0.0012</b>                                                                                   | p = 0.9997                                        |            |
|              |         |                   | APP.tg   | EGFP-Tau  | EpoD      | 5               | 18                                           | 1.27 $\pm$ 0.07  |                                                                                           |                                              | p = 0.2809                                                      |                                                                                                                                | p = 0.0021                                        |            |
|              |         | P7DIV20           | n.tg     | EGFP      | EpoD      | 5               | 13                                           | 1.43 $\pm$ 0.11  |                                                                                           | <b>F (3,79) = 1.824</b><br><b>p = 0.1496</b> | p = 0.9998                                                      |                                                                                                                                |                                                   |            |
|              |         |                   | APP.tg   | EGFP      | EpoD      | 6               | 25                                           | 1.443 $\pm$ 0.06 |                                                                                           |                                              |                                                                 |                                                                                                                                |                                                   |            |
| CA3          | rad.    | P7DIV15           | n.tg     | EGFP-Tau  | EpoD      | 5               | 18                                           | 1.419 $\pm$ 0.07 | <b>F (3,79) = 1.824</b><br><b>p = 0.1496</b>                                              |                                              | p = 0.2007                                                      | p = 0.2235                                                                                                                     | <b>F (3,61) = 10.920</b><br><b>p &lt; 0.0001</b>  | p = 0.5087 |
|              |         |                   | APP.tg   | EGFP-Tau  | EpoD      | 5               | 21                                           | 1.20 $\pm$ 0.06  |                                                                                           |                                              |                                                                 | p = 0.6170                                                                                                                     |                                                   | p = 0.0040 |
| P7DIV20      | n.tg    | EGFP              | EpoD     | 5         | 22        | 1.21 $\pm$ 0.09 | <b>F (3,79) = 1.824</b><br><b>p = 0.1496</b> | p = 0.6604       |                                                                                           |                                              |                                                                 |                                                                                                                                |                                                   |            |
|              | APP.tg  | EGFP              | EpoD     | 5         | 22        | 1.32 $\pm$ 0.08 |                                              |                  |                                                                                           |                                              |                                                                 |                                                                                                                                |                                                   |            |

| Brain region | Stratum    | Culture condition | Genotype | Construct | Treatment  | Mice (n) | Dendritic segments (n) | Mean $\pm$ s.e.m (fold change of untreated same genotype) | One way ANOVA (All treatment, both genotype)     | Post hoc (I) p values (versus APP.tg, same treatment) | Post hoc (I) p values (versus treated DAPT, same genotype) | One way ANOVA (EGFP-Tau Nocodazol together with untreated P7DIV20 same genotype from Fig.1C) | Post hoc (I) p values | One way ANOVA (EGFP-Tau DAPT together with untreated P7DIV20 same genotype from Fig.1C) | Post hoc (I) p values | One way ANOVA (EGFP-Tau DAPT+Noc. together with untreated P7DIV20 same genotype from Fig.1C) | Post hoc (I) p values |                      |                      |
|--------------|------------|-------------------|----------|-----------|------------|----------|------------------------|-----------------------------------------------------------|--------------------------------------------------|-------------------------------------------------------|------------------------------------------------------------|----------------------------------------------------------------------------------------------|-----------------------|-----------------------------------------------------------------------------------------|-----------------------|----------------------------------------------------------------------------------------------|-----------------------|----------------------|----------------------|
| CA1          | rad. + or. | P7DIV20           | n.tg     | EGFP-Tau  | Nocodazole | 3        | 25                     | -21.24 $\pm$ 4.003                                        | <b>F (5,233) = 58.53</b><br><b>p &lt; 0.0001</b> | <b>p &lt; 0.0001</b>                                  | <b>p = 0.0400</b>                                          | <b>F (3,87) = 6.685</b><br><b>p = 0.0004</b>                                                 | <b>p = 0.0032</b>     | <b>F (3,128) = 9.207</b><br><b>p &lt; 0.0001</b>                                        | p = 0.6000            | <b>F (3,75) = 8.361</b><br><b>p &lt; 0.0001</b>                                              |                       |                      |                      |
|              |            |                   | n.tg     | EGFP-Tau  | DAPT       | 6        | 76                     | -3.988 $\pm$ 2.771                                        |                                                  |                                                       |                                                            |                                                                                              |                       |                                                                                         |                       |                                                                                              | <b>p &lt; 0.0001</b>  | <b>p = 0.0017</b>    | <b>p &lt; 0.0001</b> |
|              |            |                   | n.tg     | EGFP-Tau  | DAPT+Noc.  | 5        | 34                     | -24.38 $\pm$ 2.829                                        |                                                  | <b>p &lt; 0.0001</b>                                  | <b>p = 0.0182</b>                                          |                                                                                              |                       |                                                                                         |                       |                                                                                              |                       |                      |                      |
|              |            |                   | APP.tg   | EGFP-Tau  | Nocodazole | 4        | 46                     | 22.61 $\pm$ 4.089                                         |                                                  |                                                       |                                                            |                                                                                              |                       |                                                                                         |                       |                                                                                              | <b>p &lt; 0.0001</b>  | <b>p &lt; 0.0001</b> |                      |
|              |            | P7DIV20           | APP.tg   | EGFP-Tau  | DAPT       | 3        | 35                     | 61.50 $\pm$ 5.549                                         |                                                  | <b>p &lt; 0.0001</b>                                  | <b>p &lt; 0.0001</b>                                       |                                                                                              |                       |                                                                                         |                       |                                                                                              |                       |                      |                      |
|              |            |                   | n.tg     | EGFP      | DAPT+Noc.  | 3        | 23                     | 29.14 $\pm$ 5.614                                         |                                                  |                                                       |                                                            |                                                                                              | <b>p &lt; 0.0001</b>  |                                                                                         | <b>p &lt; 0.0001</b>  |                                                                                              |                       |                      |                      |
|              |            |                   | APP.tg   | EGFP-Tau  | DAPT+Noc.  | 3        | 23                     | 29.14 $\pm$ 5.614                                         |                                                  |                                                       |                                                            |                                                                                              |                       |                                                                                         |                       |                                                                                              | <b>p &lt; 0.0001</b>  | <b>p &lt; 0.0001</b> |                      |
|              |            |                   | APP.tg   | EGFP-Tau  | DAPT+Noc.  | 3        | 23                     | 29.14 $\pm$ 5.614                                         |                                                  |                                                       |                                                            |                                                                                              |                       |                                                                                         |                       |                                                                                              |                       |                      | <b>p &lt; 0.0001</b> |

| Brain region | Stratum | Culture condition | Genotype | Construct | Treatment | Mice (n) | Dendritic segments (n) | Mean $\pm$ s.e.m | One way ANOVA (EGFP-Tau treated both genotypes together with untreated P7DIV20 both genotypes from Fig 1C) | Post hoc (I) p values (n.tg versus APP.tg) | Post hoc (I) p values (versus untreated P7DIV20, same genotype) |
|--------------|---------|-------------------|----------|-----------|-----------|----------|------------------------|------------------|------------------------------------------------------------------------------------------------------------|--------------------------------------------|-----------------------------------------------------------------|
|--------------|---------|-------------------|----------|-----------|-----------|----------|------------------------|------------------|------------------------------------------------------------------------------------------------------------|--------------------------------------------|-----------------------------------------------------------------|

|     |      |         |        |          |      |   |    |             |                                |            |            |
|-----|------|---------|--------|----------|------|---|----|-------------|--------------------------------|------------|------------|
| CA1 | rad. | P7DIV20 | n.tg   | EGFP-Tau | EpoD | 7 | 16 | 1.33 ± 0.07 | F (3,54) = 14.71<br>p < 0.0001 | p = 0.9394 | p = 0.4831 |
|     |      |         | APP.tg | EGFP-Tau | EpoD | 7 | 19 | 1.39 ± 0.07 |                                |            | p < 0.0001 |
|     | or.  | P7DIV20 | n.tg   | EGFP-Tau | EpoD | 7 | 14 | 1.34 ± 0.09 | F (3,42) = 14.87<br>p < 0.0001 | p = 0.8581 | p = 0.0367 |
|     |      |         | APP.tg | EGFP-Tau | EpoD | 7 | 17 | 1.42 ± 0.06 |                                |            | p < 0.0001 |
| CA3 | rad. | P7DIV20 | n.tg   | EGFP-Tau | EpoD | 6 | 20 | 1.21 ± 0.04 | F (3,81) = 26.95<br>p < 0.0001 | p = 0.1432 | p = 0.9268 |
|     |      |         | APP.tg | EGFP-Tau | EpoD | 5 | 21 | 1.36 ± 0.06 |                                |            | p < 0.0001 |
|     | or.  | P7DIV20 | n.tg   | EGFP-Tau | EpoD | 6 | 10 | 1.22 ± 0.06 | F (3,32) = 9.547<br>p = 0.0001 | p = 0.4907 | p = 0.3063 |
|     |      |         | APP.tg | EGFP-Tau | EpoD | 5 | 11 | 1.35 ± 0.09 |                                |            | p = 0.0003 |

(I) Tukey's multiple comparisons test      **rad.** stratum radiatum (apical dendrites)

**or.** stratum oriens (basal dendrites)

| SPINE LENGTH [ $\mu\text{m}$ ] |            |                   |          |           |           |          |                        |                   |                                                                                                            |                                            |                                                                 |                                                                                                                                |                                                   |
|--------------------------------|------------|-------------------|----------|-----------|-----------|----------|------------------------|-------------------|------------------------------------------------------------------------------------------------------------|--------------------------------------------|-----------------------------------------------------------------|--------------------------------------------------------------------------------------------------------------------------------|---------------------------------------------------|
| Brain region                   | Stratum    | Culture condition | Genotype | Construct | Treatment | Mice (n) | Dendritic segments (n) | Mean $\pm$ s.e.m  | One way ANOVA (All culture time, both genotype)                                                            | Post hoc (I) p values (n.tg versus APP.tg) | Post hoc (I) p values (versus P7DIV20, same genotype)           | Post hoc (I) p values (versus P14DIV20, same genotype)                                                                         |                                                   |
| CA1                            | rad.       | P7DIV15           | n.tg     | EGFP-Tau  | /         | $\geq 4$ | 13                     | 0.94 $\pm$ 0.05   | <b>F (5,73) = 6.304</b><br><b>p &lt; 0.0001</b>                                                            | p = 0.1934                                 | p = 0.9648                                                      | p = 0.9511                                                                                                                     |                                                   |
|                                |            |                   | APP.tg   | EGFP-Tau  | /         | $\geq 4$ | 15                     | 0.78 $\pm$ 0.04   |                                                                                                            |                                            |                                                                 |                                                                                                                                | p = 0.8505                                        |
|                                |            | P7DIV20           | n.tg     | EGFP-Tau  | /         | $\geq 4$ | 11                     | 1.0 $\pm$ 0.09    |                                                                                                            | p = 0.1750                                 | p > 0.9999                                                      |                                                                                                                                |                                                   |
|                                |            |                   | APP.tg   | EGFP-Tau  | /         | $\geq 4$ | 12                     | 0.82 $\pm$ 0.05   |                                                                                                            |                                            |                                                                 | p = 0.5634                                                                                                                     |                                                   |
|                                |            | P14DIV20          | n.tg     | EGFP-Tau  | /         | $\geq 4$ | 15                     | 1.0 $\pm$ 0.03    |                                                                                                            | p = 0.0005                                 | p = 0.9993                                                      |                                                                                                                                |                                                   |
|                                |            |                   | APP.tg   | EGFP-Tau  | /         | $\geq 4$ | 13                     | 0.7 $\pm$ 0.04    |                                                                                                            |                                            |                                                                 | p = 0.1252                                                                                                                     |                                                   |
|                                | or.        | P7DIV15           | n.tg     | EGFP-Tau  | /         | $\geq 4$ | 6                      | 0.83 $\pm$ 0.06   | <b>F (5,46) = 5.821</b><br><b>p = 0.0003</b>                                                               | p > 0.9999                                 | p = 0.8083                                                      | p = 0.6876                                                                                                                     |                                                   |
|                                |            |                   | APP.tg   | EGFP-Tau  | /         | $\geq 4$ | 6                      | 0.81 $\pm$ 0.09   |                                                                                                            |                                            |                                                                 |                                                                                                                                | p = 0.1736                                        |
|                                |            | P7DIV20           | n.tg     | EGFP-Tau  | /         | $\geq 4$ | 8                      | 0.87 $\pm$ 0.1    |                                                                                                            | p = 0.9646                                 | p = 0.0492                                                      |                                                                                                                                |                                                   |
|                                |            |                   | APP.tg   | EGFP-Tau  | /         | $\geq 4$ | 7                      | 0.96 $\pm$ 0.06   |                                                                                                            |                                            |                                                                 | p = 0.1366                                                                                                                     |                                                   |
|                                |            | P14DIV20          | n.tg     | EGFP-Tau  | /         | $\geq 4$ | 14                     | 1.1 $\pm$ 0.07    |                                                                                                            | p < 0.0001                                 | p = 0.9999                                                      |                                                                                                                                |                                                   |
|                                |            |                   | APP.tg   | EGFP-Tau  | /         | $\geq 4$ | 11                     | 0.65 $\pm$ 0.04   |                                                                                                            |                                            |                                                                 | p = 0.1366                                                                                                                     |                                                   |
| CA3                            | rad.       | P7DIV15           | n.tg     | EGFP-Tau  | /         | $\geq 4$ | 15                     | 0.88 $\pm$ 0.04   | <b>F (5,94) = 13.47</b><br><b>p &lt; 0.0001</b>                                                            | p = 0.6539                                 | p = 0.9266                                                      | p = 0.0123                                                                                                                     |                                                   |
|                                |            |                   | APP.tg   | EGFP-Tau  | /         | $\geq 4$ | 11                     | 0.79 $\pm$ 0.09   |                                                                                                            |                                            |                                                                 |                                                                                                                                | p = 0.9637                                        |
|                                |            | P7DIV20           | n.tg     | EGFP-Tau  | /         | $\geq 4$ | 19                     | 0.93 $\pm$ 0.02   |                                                                                                            | p = 0.0002                                 | p = 0.1058                                                      |                                                                                                                                |                                                   |
|                                |            |                   | APP.tg   | EGFP-Tau  | /         | $\geq 4$ | 25                     | 0.72 $\pm$ 0.02   |                                                                                                            |                                            |                                                                 | p = 0.9988                                                                                                                     |                                                   |
|                                |            | P14DIV20          | n.tg     | EGFP-Tau  | /         | $\geq 4$ | 17                     | 1.06 $\pm$ 0.03   |                                                                                                            | p < 0.0001                                 | p = 0.9999                                                      |                                                                                                                                |                                                   |
|                                |            |                   | APP.tg   | EGFP-Tau  | /         | $\geq 4$ | 13                     | 0.74 $\pm$ 0.04   |                                                                                                            |                                            |                                                                 | p = 0.9967                                                                                                                     |                                                   |
|                                | or.        | P7DIV15           | n.tg     | EGFP-Tau  | /         | $\geq 4$ | 6                      | 0.94 $\pm$ 0.06   | <b>F (5,57) = 7.729</b><br><b>p &lt; 0.0001</b>                                                            | p = 0.1461                                 | p = 0.9877                                                      | p > 0.9999                                                                                                                     |                                                   |
|                                |            |                   | APP.tg   | EGFP-Tau  | /         | $\geq 4$ | 6                      | 0.69 $\pm$ 0.07   |                                                                                                            |                                            |                                                                 |                                                                                                                                | p = 0.9998                                        |
|                                |            | P7DIV20           | n.tg     | EGFP-Tau  | /         | $\geq 4$ | 8                      | 1.0 $\pm$ 0.06    |                                                                                                            | p = 0.0590                                 | p = 0.9954                                                      | p = 0.9951                                                                                                                     |                                                   |
|                                |            |                   | APP.tg   | EGFP-Tau  | /         | $\geq 4$ | 7                      | 0.74 $\pm$ 0.04   |                                                                                                            |                                            |                                                                 |                                                                                                                                | p = 0.9951                                        |
|                                |            | P14DIV20          | n.tg     | EGFP-Tau  | /         | $\geq 4$ | 16                     | 0.98 $\pm$ 0.05   |                                                                                                            | p = 0.0002                                 | p = 0.9954                                                      |                                                                                                                                |                                                   |
|                                |            |                   | APP.tg   | EGFP-Tau  | /         | $\geq 4$ | 20                     | 0.70 $\pm$ 0.04   |                                                                                                            |                                            |                                                                 | p = 0.9951                                                                                                                     |                                                   |
| Brain region                   | Stratum    | Culture condition | Genotype | Construct | Treatment | Mice (n) | Dendritic segments (n) | Mean $\pm$ s.e.m  | One way ANOVA (Untreated both genotypes together with DAPT treated both genotypes)                         | Post hoc (I) p values (n.tg versus APP.tg) | Post hoc (I) p values (versus DAPT treated, same genotype)      |                                                                                                                                |                                                   |
| CA1                            | rad. + or. | P7DIV20           | n.tg     | EGFP-Tau  | /         | $\geq 4$ | 10                     | 0.94 $\pm$ 0.07   | <b>F (3,49) = 0.7622</b><br><b>p = 0.5207</b>                                                              | p = 0.8226                                 | p = 0.4382                                                      |                                                                                                                                |                                                   |
|                                |            |                   | APP.tg   | EGFP-Tau  | /         | $\geq 4$ | 12                     | 0.88 $\pm$ 0.04   |                                                                                                            |                                            |                                                                 | p > 0.9999                                                                                                                     |                                                   |
|                                |            | P7DIV20           | n.tg     | EGFP-Tau  | DAPT      | $\geq 4$ | 16                     | 0.84 $\pm$ 0.04   |                                                                                                            | p = 0.9097                                 |                                                                 |                                                                                                                                |                                                   |
|                                |            |                   | APP.tg   | EGFP-Tau  | DAPT      | $\geq 4$ | 15                     | 0.88 $\pm$ 0.04   |                                                                                                            |                                            |                                                                 |                                                                                                                                |                                                   |
| CA3                            | rad. + or. | P7DIV20           | n.tg     | EGFP-Tau  | /         | $\geq 4$ | 33                     | 0.95 $\pm$ 0.04   | <b>F (3,101) = 11.14</b><br><b>p &lt; 0.0001</b>                                                           | p < 0.0001                                 | p = 0.6382                                                      |                                                                                                                                |                                                   |
|                                |            |                   | APP.tg   | EGFP-Tau  | /         | $\geq 4$ | 40                     | 0.73 $\pm$ 0.02   |                                                                                                            |                                            |                                                                 | p = 0.1829                                                                                                                     |                                                   |
|                                |            | P7DIV20           | n.tg     | EGFP-Tau  | DAPT      | $\geq 4$ | 16                     | 0.89 $\pm$ 0.02   |                                                                                                            | p = 0.7379                                 |                                                                 |                                                                                                                                |                                                   |
|                                |            |                   | APP.tg   | EGFP-Tau  | DAPT      | $\geq 4$ | 16                     | 0.83 $\pm$ 0.04   |                                                                                                            |                                            |                                                                 |                                                                                                                                |                                                   |
| Brain region                   | Stratum    | Culture condition | Genotype | Construct | Treatment | Mice (n) | Dendritic segments (n) | Mean $\pm$ s.e.m  | One way ANOVA (EGFP-Tau treated both genotypes together with EGFP treated both genotypes)                  | Post hoc (I) p values (n.tg versus APP.tg) | Post hoc (I) p values (versus EGFP, same genotype)              | One way ANOVA (EGFP-Tau treated both genotypes together with EGFP-Tau untreated both genotypes, same culture time from Fig 2B) | Post hoc (I) p values (versus EGFT-Tau untreated) |
| CA1                            | rad.       | P7DIV15           | n.tg     | EGFP-Tau  | EpoD      | 5        | 31                     | 0.87 $\pm$ 0.02   | <b>F (3,83) = 7.203</b><br><b>p = 0.0002</b>                                                               | p = 0.3861                                 | p = 0.0236                                                      | <b>F (3,73) = 3.545</b><br><b>p = 0.0186</b>                                                                                   | p = 0.4570                                        |
|                                |            |                   | APP.tg   | EGFP-Tau  | EpoD      | 5        | 18                     | 0.81 $\pm$ 0.03   |                                                                                                            |                                            |                                                                 |                                                                                                                                |                                                   |
|                                |            |                   | n.tg     | EGFP      | EpoD      | 5        | 13                     | 0.74 $\pm$ 0.02   |                                                                                                            | p = 0.9160                                 |                                                                 |                                                                                                                                |                                                   |
|                                |            |                   | APP.tg   | EGFP      | EpoD      | 6        | 25                     | 0.71 $\pm$ 0.03   |                                                                                                            |                                            |                                                                 |                                                                                                                                |                                                   |
| CA3                            | rad.       | P7DIV15           | n.tg     | EGFP-Tau  | EpoD      | 5        | 18                     | 0.73 $\pm$ 0.03   | <b>F (3,79) = 6.475</b><br><b>p = 0.0006</b>                                                               | p = 0.7343                                 | p = 0.0222                                                      | F (3,73) = 1.507<br>p = 0.2216                                                                                                 | p = 0.1616                                        |
|                                |            |                   | APP.tg   | EGFP-Tau  | EpoD      | 5        | 21                     | 0.79 $\pm$ 0.05   |                                                                                                            |                                            |                                                                 |                                                                                                                                |                                                   |
|                                |            |                   | n.tg     | EGFP      | EpoD      | 5        | 22                     | 0.59 $\pm$ 0.02   |                                                                                                            | p = 0.4288                                 |                                                                 |                                                                                                                                |                                                   |
|                                |            |                   | APP.tg   | EGFP      | EpoD      | 5        | 22                     | 0.66 $\pm$ 0.03   |                                                                                                            |                                            |                                                                 |                                                                                                                                |                                                   |
| Brain region                   | Stratum    | Culture condition | Genotype | Construct | Treatment | Mice (n) | Dendritic segments (n) | Mean $\pm$ s.e.m  | One way ANOVA (EGFP-Tau treated both genotypes together with untreated P7DIV20 both genotypes from Fig 2B) | Post hoc (I) p values (n.tg versus APP.tg) | Post hoc (I) p values (versus untreated P7DIV20, same genotype) |                                                                                                                                |                                                   |
| CA1                            | rad.       | P7DIV20           | n.tg     | EGFP-Tau  | EpoD      | 7        | 16                     | 0.85 $\pm$ 0.04   | <b>F (3,54) = 3.248</b><br><b>p = 0.0288</b>                                                               | p = 0.7117                                 | p = 0.1905                                                      |                                                                                                                                |                                                   |
|                                |            |                   | APP.tg   | EGFP-Tau  | EpoD      | 7        | 19                     | 0.78 $\pm$ 0.02   |                                                                                                            |                                            |                                                                 | p = 0.9490                                                                                                                     |                                                   |
|                                | or.        | P7DIV20           | n.tg     | EGFP-Tau  | EpoD      | 7        | 14                     | 0.67 $\pm$ 0.03   | <b>F (3,42) = 4.055</b><br><b>p = 0.0128</b>                                                               | p = 0.6809                                 | p = 0.1225                                                      |                                                                                                                                |                                                   |
|                                |            |                   | APP.tg   | EGFP-Tau  | EpoD      | 7        | 17                     | 0.75 $\pm$ 0.05   |                                                                                                            |                                            |                                                                 | p = 0.0980                                                                                                                     |                                                   |
|                                | rad.       | P7DIV20           | n.tg     | EGFP-Tau  | EpoD      | 6        | 20                     | 0.6633 $\pm$ 0.02 | <b>F (3,81) = 24.32</b>                                                                                    | p = 0.1775                                 | p < 0.0001                                                      |                                                                                                                                |                                                   |

| CA3 | stratum | P7DIV20 | EGFP-Tau |          |      |   | EpoD |             | p < 0.0001 | F (3,32) = 20.650 | p = 0.9894 | p = 0.9875 |
|-----|---------|---------|----------|----------|------|---|------|-------------|------------|-------------------|------------|------------|
|     |         |         | APP.tg   | EGFP-Tau | EpoD | n | n    | mean ± SD   |            |                   |            |            |
|     | or.     | P7DIV20 | n.tg     | EGFP-Tau | EpoD | 6 | 10   | 0.63 ± 0.03 |            |                   | p < 0.0001 |            |
|     |         |         | APP.tg   | EGFP-Tau | EpoD | 5 | 11   | 0.62 ± 0.02 |            |                   | p = 0.1416 |            |

(I) Tukey's multiple comparisons test  
 rad. stratum radiatum (APICAL DENDRITES)  
 or. stratum oriens (BASAL DENDRITES)





| FRACTION OF SPINE [%] |          |            |                   |          |           |           |                                              |                                               |                                                 |                                                  |                                                 |                                                          |                                                           |                          |                                 |
|-----------------------|----------|------------|-------------------|----------|-----------|-----------|----------------------------------------------|-----------------------------------------------|-------------------------------------------------|--------------------------------------------------|-------------------------------------------------|----------------------------------------------------------|-----------------------------------------------------------|--------------------------|---------------------------------|
| Brain region          | Stratum  | Spine type | Culture condition | Genotype | Construct | Treatment | Mice (n)                                     | Dendritic segments (n)                        | Mean ± s.e.m                                    | One way ANOVA<br>All culture time, both genotype | Post hoc (I) p values<br>(n.tg versus APP.tg)   | Post hoc (I) p values<br>(versus P7DIV20, same genotype) | Post hoc (I) p values<br>(versus P14DIV20, same genotype) |                          |                                 |
| CA1                   | rad.     | MUSH.      | P7DIV15           | n.tg     | EGFP-Tau  | /         | ∞4                                           | 13                                            | 50 ± 3.5                                        | <b>F (5,73) = 6.115</b><br><b>p &lt; 0.0001</b>  | p = 0.5816                                      | p = 0.9959<br>p = 0.7162                                 | p = 0.9941<br><b>p = 0.0334</b>                           |                          |                                 |
|                       |          |            |                   | APP.tg   | EGFP-Tau  | /         | ∞4                                           | 15                                            | 41 ± 2.8                                        |                                                  |                                                 |                                                          |                                                           | p > 0.9999<br>p = 0.6379 |                                 |
|                       |          |            | P7DIV20           | n.tg     | EGFP-Tau  | /         | ∞4                                           | 11                                            | 47 ± 4.4                                        |                                                  | <b>F (5,73) = 3.910</b><br><b>p = 0.0034</b>    | p = 0.2066                                               | p > 0.9999<br>p = 0.8660                                  |                          |                                 |
|                       |          |            |                   | APP.tg   | EGFP-Tau  | /         | ∞4                                           | 12                                            | 33 ± 5.1                                        |                                                  |                                                 |                                                          |                                                           |                          |                                 |
|                       |          |            | P14DIV20          | n.tg     | EGFP-Tau  | /         | ∞4                                           | 15                                            | 47 ± 1.9                                        |                                                  |                                                 | <b>F (5,73) = 2.370</b><br><b>p = 0.0475</b>             | <b>p = 0.0011</b>                                         | p > 0.9999<br>p = 0.9241 | p > 0.9999<br>p = 0.2530        |
|                       |          |            |                   | APP.tg   | EGFP-Tau  | /         | ∞4                                           | 13                                            | 24 ± 6.0                                        |                                                  |                                                 |                                                          |                                                           |                          |                                 |
|                       |          | P7DIV15    | n.tg              | EGFP-Tau | /         | ∞4        | 13                                           | 38 ± 2.7                                      | <b>F (5,73) = 4.559</b><br><b>p = 0.0018</b>    | p = 0.7290                                       |                                                 |                                                          | p > 0.9999<br>p = 0.9241                                  | p > 0.9999<br>p = 0.2530 |                                 |
|                       |          |            | APP.tg            | EGFP-Tau | /         | ∞4        | 15                                           | 45 ± 3.8                                      |                                                 |                                                  |                                                 |                                                          |                                                           |                          |                                 |
|                       |          | P7DIV20    | n.tg              | EGFP-Tau | /         | ∞4        | 11                                           | 39 ± 3.9                                      |                                                 | <b>F (5,73) = 2.370</b><br><b>p = 0.0475</b>     | p = 0.3569                                      |                                                          | p > 0.9999<br>p = 0.8660                                  |                          |                                 |
|                       |          |            | APP.tg            | EGFP-Tau | /         | ∞4        | 12                                           | 50 ± 4.6                                      |                                                 |                                                  |                                                 |                                                          |                                                           |                          |                                 |
|                       |          | P14DIV20   | n.tg              | EGFP-Tau | /         | ∞4        | 15                                           | 39 ± 2.9                                      |                                                 |                                                  | <b>F (5,73) = 2.370</b><br><b>p = 0.0475</b>    | <b>p = 0.0138</b>                                        | p > 0.9999<br>p = 0.9241                                  | p > 0.9999<br>p = 0.2530 |                                 |
|                       |          |            | APP.tg            | EGFP-Tau | /         | ∞4        | 13                                           | 56 ± 3.9                                      |                                                 |                                                  |                                                 |                                                          |                                                           |                          |                                 |
|                       | Thin     | P7DIV15    | n.tg              | EGFP-Tau | /         | ∞4        | 13                                           | 12 ± 2.7                                      | <b>F (5,73) = 2.370</b><br><b>p = 0.0475</b>    |                                                  |                                                 | p = 0.9809                                               | p = 0.9866<br>p = 0.9054                                  | p = 0.1490<br>p = 0.2932 |                                 |
|                       |          |            | APP.tg            | EGFP-Tau | /         | ∞4        | 15                                           | 14 ± 2.0                                      |                                                 |                                                  |                                                 |                                                          |                                                           |                          |                                 |
|                       | P7DIV20  | n.tg       | EGFP-Tau          | /        | ∞4        | 11        | 14 ± 2.0                                     | <b>F (5,73) = 2.370</b><br><b>p = 0.0475</b>  |                                                 | p = 0.9295                                       |                                                 | p = 0.9866<br>p = 0.9054                                 | p = 0.1490<br>p = 0.2932                                  |                          |                                 |
|                       |          | APP.tg     | EGFP-Tau          | /        | ∞4        | 12        | 17 ± 2.0                                     |                                               |                                                 |                                                  |                                                 |                                                          |                                                           |                          |                                 |
|                       | P14DIV20 | n.tg       | EGFP-Tau          | /        | ∞4        | 15        | 19 ± 1.6                                     |                                               |                                                 | <b>F (5,73) = 2.370</b><br><b>p = 0.0475</b>     | p = 0.9993                                      | p = 0.9866<br>p = 0.9054                                 | p = 0.1490<br>p = 0.2932                                  |                          |                                 |
|                       |          | APP.tg     | EGFP-Tau          | /        | ∞4        | 13        | 20 ± 2.0                                     |                                               |                                                 |                                                  |                                                 |                                                          |                                                           |                          |                                 |
|                       | or.      | MUSH.      | P7DIV15           | n.tg     | EGFP-Tau  | /         | ∞4                                           |                                               | 6                                               |                                                  | 45 ± 3.0                                        | <b>F (5,46) = 4.559</b><br><b>p = 0.0018</b>             | p = 0.9672                                                | p = 0.8403<br>p = 0.6767 | p > 0.9999<br>p = 0.1371        |
|                       |          |            |                   | APP.tg   | EGFP-Tau  | /         | ∞4                                           |                                               | 6                                               |                                                  | 40 ± 2.0                                        |                                                          |                                                           |                          |                                 |
|                       |          |            | P7DIV20           | n.tg     | EGFP-Tau  | /         | ∞4                                           | 8                                             | 38 ± 5.6                                        |                                                  | <b>F (5,46) = 4.477</b><br><b>p = 0.0021</b>    |                                                          | p = 0.8151                                                | p > 0.9999<br>p > 0.9999 | p = 0.6423<br>p = 0.6794        |
|                       |          |            |                   | APP.tg   | EGFP-Tau  | /         | ∞4                                           | 7                                             | 31 ± 3.7                                        |                                                  |                                                 |                                                          |                                                           |                          |                                 |
|                       |          |            | P14DIV20          | n.tg     | EGFP-Tau  | /         | ∞4                                           | 14                                            | 44 ± 2.6                                        | <b>F (5,46) = 4.477</b><br><b>p = 0.0021</b>     |                                                 |                                                          | <b>p = 0.0022</b>                                         | p > 0.9999<br>p > 0.9999 | p = 0.4125<br>p = 0.5097        |
|                       |          |            |                   | APP.tg   | EGFP-Tau  | /         | ∞4                                           | 11                                            | 26 ± 3.6                                        |                                                  |                                                 |                                                          |                                                           |                          |                                 |
| P7DIV15               |          | n.tg       | EGFP-Tau          | /        | ∞4        | 6         | 42 ± 2.5                                     | <b>F (5,46) = 2.990</b><br><b>p = 0.0203</b>  | p = 0.9864                                      |                                                  |                                                 | p > 0.9999<br>p > 0.9999                                 | p = 0.6423<br>p = 0.6794                                  |                          |                                 |
|                       |          | APP.tg     | EGFP-Tau          | /        | ∞4        | 6         | 46 ± 2.6                                     |                                               |                                                 |                                                  |                                                 |                                                          |                                                           |                          |                                 |
| P7DIV20               |          | n.tg       | EGFP-Tau          | /        | ∞4        | 8         | 43 ± 6.0                                     |                                               | <b>F (5,46) = 2.990</b><br><b>p = 0.0203</b>    |                                                  | p = 0.9991                                      | p > 0.9999<br>p > 0.9999                                 | p = 0.4125<br>p = 0.5097                                  |                          |                                 |
|                       |          | APP.tg     | EGFP-Tau          | /        | ∞4        | 7         | 45 ± 3.7                                     |                                               |                                                 |                                                  |                                                 |                                                          |                                                           |                          |                                 |
| P14DIV20              |          | n.tg       | EGFP-Tau          | /        | ∞4        | 14        | 34 ± 1.3                                     |                                               |                                                 | <b>F (5,46) = 2.990</b><br><b>p = 0.0203</b>     | <b>p = 0.0004</b>                               | p > 0.9999<br>p = 0.0507                                 | p = 0.1985<br>p = 0.8093                                  |                          |                                 |
|                       |          | APP.tg     | EGFP-Tau          | /        | ∞4        | 11        | 54 ± 4.2                                     |                                               |                                                 |                                                  |                                                 |                                                          |                                                           |                          |                                 |
| Thin                  | P7DIV15  | n.tg       | EGFP-Tau          | /        | ∞4        | 6         | 12 ± 2.0                                     | <b>F (5,46) = 2.990</b><br><b>p = 0.0203</b>  |                                                 |                                                  | p > 0.9999                                      | p = 0.7203<br>p = 0.0507                                 | p = 0.1985<br>p = 0.8093                                  |                          |                                 |
|                       |          | APP.tg     | EGFP-Tau          | /        | ∞4        | 6         | 11 ± 2.0                                     |                                               |                                                 |                                                  |                                                 |                                                          |                                                           |                          |                                 |
| P7DIV20               | n.tg     | EGFP-Tau   | /                 | ∞4       | 8         | 18 ± 2.0  | <b>F (5,46) = 2.990</b><br><b>p = 0.0203</b> |                                               | p = 0.6832                                      |                                                  | p = 0.7203<br>p = 0.0507                        | p = 0.1985<br>p = 0.8093                                 |                                                           |                          |                                 |
|                       | APP.tg   | EGFP-Tau   | /                 | ∞4       | 7         | 24 ± 2.0  |                                              |                                               |                                                 |                                                  |                                                 |                                                          |                                                           |                          |                                 |
| P14DIV20              | n.tg     | EGFP-Tau   | /                 | ∞4       | 14        | 21 ± 2.6  |                                              |                                               | <b>F (5,46) = 2.990</b><br><b>p = 0.0203</b>    | p = 0.6181                                       | p = 0.7203<br>p = 0.0507                        | p = 0.1985<br>p = 0.8093                                 |                                                           |                          |                                 |
|                       | APP.tg   | EGFP-Tau   | /                 | ∞4       | 11        | 16 ± 3.0  |                                              |                                               |                                                 |                                                  |                                                 |                                                          |                                                           |                          |                                 |
| CA3                   | rad.     | MUSH.      | P7DIV15           | n.tg     | EGFP-Tau  | /         |                                              | ∞4                                            |                                                 | 15                                               | 50 ± 3.1                                        | <b>F (5,94) = 15.49</b><br><b>p &lt; 0.0001</b>          | p = 0.2231                                                | p = 0.9043<br>p = 0.1424 | p = 0.9959<br><b>p = 0.0334</b> |
|                       |          |            |                   | APP.tg   | EGFP-Tau  | /         |                                              | ∞4                                            |                                                 | 11                                               | 40 ± 4.1                                        |                                                          |                                                           |                          |                                 |
|                       |          |            | P7DIV20           | n.tg     | EGFP-Tau  | /         | ∞4                                           | 19                                            |                                                 | 46 ± 1.8                                         | <b>F (5,94) = 10.77</b><br><b>p &lt; 0.0001</b> |                                                          | p = 0.0001                                                | p = 0.9826<br>p = 0.7740 | p = 0.9844<br>p = 0.1928        |
|                       |          |            |                   | APP.tg   | EGFP-Tau  | /         | ∞4                                           | 25                                            |                                                 | 30 ± 2.6                                         |                                                 |                                                          |                                                           |                          |                                 |
|                       |          |            | P14DIV20          | n.tg     | EGFP-Tau  | /         | ∞4                                           | 17                                            | 52 ± 2.1                                        | <b>F (5,94) = 10.77</b><br><b>p &lt; 0.0001</b>  |                                                 |                                                          | <b>p &lt; 0.0001</b>                                      | p = 0.9826<br>p = 0.7740 | p = 0.7092<br>p = 0.7297        |
|                       |          |            |                   | APP.tg   | EGFP-Tau  | /         | ∞4                                           | 13                                            | 26 ± 3.1                                        |                                                  |                                                 |                                                          |                                                           |                          |                                 |
|                       |          | P7DIV15    | n.tg              | EGFP-Tau | /         | ∞4        | 15                                           | 38 ± 3.5                                      | <b>F (5,94) = 0.9665</b><br><b>p = 0.4425</b>   |                                                  |                                                 | p = 0.2459                                               | p = 0.9826<br>p = 0.7740                                  | p = 0.9844<br>p = 0.1928 |                                 |
|                       |          |            | APP.tg            | EGFP-Tau | /         | ∞4        | 11                                           | 49 ± 4.8                                      |                                                 |                                                  |                                                 |                                                          |                                                           |                          |                                 |
|                       |          | P7DIV20    | n.tg              | EGFP-Tau | /         | ∞4        | 19                                           | 41 ± 3.5                                      |                                                 |                                                  | <b>F (5,94) = 0.9665</b><br><b>p = 0.4425</b>   | p = 0.0055                                               | p = 0.9826<br>p = 0.7740                                  | p = 0.7092<br>p = 0.7297 |                                 |
|                       |          |            | APP.tg            | EGFP-Tau | /         | ∞4        | 25                                           | 55 ± 2.4                                      |                                                 |                                                  |                                                 |                                                          |                                                           |                          |                                 |
|                       |          | P14DIV20   | n.tg              | EGFP-Tau | /         | ∞4        | 17                                           | 35 ± 1.5                                      |                                                 | <b>F (5,94) = 0.9665</b><br><b>p = 0.4425</b>    |                                                 | <b>p &lt; 0.0001</b>                                     | p = 0.9826<br>p = 0.7740                                  | p = 0.7092<br>p = 0.7297 |                                 |
|                       |          |            | APP.tg            | EGFP-Tau | /         | ∞4        | 13                                           | 61 ± 3.1                                      |                                                 |                                                  |                                                 |                                                          |                                                           |                          |                                 |
|                       | Thin     | P7DIV15    | n.tg              | EGFP-Tau | /         | ∞4        | 15                                           | 14 ± 1.6                                      | <b>F (5,94) = 0.9665</b><br><b>p = 0.4425</b>   |                                                  |                                                 | p = 0.9167                                               | p = 0.9989<br>p = 0.6882                                  | p = 0.9990<br>p = 0.9995 |                                 |
|                       |          |            | APP.tg            | EGFP-Tau | /         | ∞4        | 11                                           | 11 ± 2.0                                      |                                                 |                                                  |                                                 |                                                          |                                                           |                          |                                 |
|                       | P7DIV20  | n.tg       | EGFP-Tau          | /        | ∞4        | 19        | 13 ± 1.3                                     | <b>F (5,94) = 0.9665</b><br><b>p = 0.4425</b> |                                                 |                                                  | p = 0.9528                                      | p = 0.9989<br>p = 0.6882                                 | p > 0.9999<br>p = 0.3875                                  |                          |                                 |
|                       |          | APP.tg     | EGFP-Tau          | /        | ∞4        | 25        | 15 ± 2.0                                     |                                               |                                                 |                                                  |                                                 |                                                          |                                                           |                          |                                 |
|                       | P14DIV20 | n.tg       | EGFP-Tau          | /        | ∞4        | 17        | 13 ± 1.7                                     |                                               |                                                 | <b>F (5,94) = 0.9665</b><br><b>p = 0.4425</b>    | p = 0.8891                                      | p = 0.9989<br>p = 0.6882                                 | p > 0.9999<br>p = 0.3875                                  |                          |                                 |
|                       |          | APP.tg     | EGFP-Tau          | /        | ∞4        | 13        | 10 ± 2.0                                     |                                               |                                                 |                                                  |                                                 |                                                          |                                                           |                          |                                 |
|                       | or.      | MUSH.      | P7DIV15           | n.tg     | EGFP-Tau  | /         | ∞4                                           |                                               | 6                                               |                                                  | 49 ± 4.0                                        | <b>F (5,57) = 12.58</b><br><b>p &lt; 0.0001</b>          | p = 0.8164                                                | p = 0.6727<br>p = 0.9659 | p = 0.9932<br><b>p = 0.0219</b> |
|                       |          |            |                   | APP.tg   | EGFP-Tau  | /         | ∞4                                           |                                               | 6                                               |                                                  | 41 ± 4.7                                        |                                                          |                                                           |                          |                                 |
|                       |          |            | P7DIV20           | n.tg     | EGFP-Tau  | /         | ∞4                                           | 8                                             | 40 ± 2.4                                        |                                                  | <b>F (5,57) = 12.58</b><br><b>p &lt; 0.0001</b> |                                                          | p = 0.9823                                                | p = 0.6727<br>p = 0.9659 | p = 0.1488<br>p = 0.1598        |
|                       |          | APP.tg     |                   | EGFP-Tau | /         | ∞4        | 7                                            | 36 ± 3.0                                      |                                                 |                                                  |                                                 |                                                          |                                                           |                          |                                 |
|                       |          | P14DIV20   | n.tg              | EGFP-Tau | /         | ∞4        | 16                                           | 52 ± 2.2                                      | <b>F (5,57) = 12.58</b><br><b>p &lt; 0.0001</b> | <b>p &lt; 0.0001</b>                             |                                                 |                                                          | p = 0.6727<br>p = 0.9659                                  | p = 0.1488<br>p = 0.1598 |                                 |
|                       |          |            | APP.tg            | EGFP-Tau | /         | ∞4        | 20                                           | 24 ± 3.3                                      |                                                 |                                                  |                                                 |                                                          |                                                           |                          |                                 |
| Stubby                | P7DIV15  | n.tg       | EGFP-Tau          | /        | ∞4        | 6         | 42 ± 3.3                                     | <b>F (5,57) = 7.448</b>                       |                                                 | p = 0.9986                                       |                                                 | p = 0.9997<br>p = 0.9937                                 | p = 0.7951<br>p = 0.1516                                  |                          |                                 |
|                       |          | APP.tg     | EGFP-Tau          | /        | ∞4        | 6         | 45 ± 3.0                                     |                                               |                                                 |                                                  |                                                 |                                                          |                                                           |                          |                                 |
|                       | P7DIV20  | n.tg       | EGFP-Tau          | /        | ∞4        | 8         | 44 ± 2.9                                     |                                               |                                                 | <b>F (5,57) = 7.448</b>                          | n = 0.9761                                      | p = 0.9997<br>p = 0.9937                                 | p = 0.7951<br>p = 0.1516                                  |                          |                                 |

|          |        |          |          |        |          |          |          |    |          |            |            |            |    |          |                                 |            |            |            |            |
|----------|--------|----------|----------|--------|----------|----------|----------|----|----------|------------|------------|------------|----|----------|---------------------------------|------------|------------|------------|------------|
|          | ul.    | Stratum  | P14DIV20 | APP.tg | EGFP-Tau | /        | ≥4       | 7  | 49 ± 2.7 | p < 0.0001 | p < 0.0001 | p = 0.4027 |    |          |                                 |            |            |            |            |
|          |        |          |          | n.tg   | EGFP-Tau | /        | ≥4       | 16 | 34 ± 2.0 |            |            |            |    |          |                                 |            |            |            |            |
|          |        |          |          | APP.tg | EGFP-Tau | /        | ≥4       | 20 | 60 ± 4.4 |            |            |            |    |          |                                 |            |            |            |            |
|          |        |          |          | n.tg   | EGFP-Tau | /        | ≥4       | 6  | 10 ± 2.0 |            |            |            |    |          |                                 |            |            |            |            |
|          |        |          |          | Thin   | P7DIV15  | APP.tg   | EGFP-Tau | /  | ≥4       |            |            |            | 6  | 14 ± 2.1 | F (5,57) = 0.5680<br>p = 0.7241 | p = 0.9753 | p = 0.9175 | p = 0.7573 |            |
|          |        |          |          |        |          | n.tg     | EGFP-Tau | /  | ≥4       |            |            |            | 8  | 15 ± 1.3 |                                 |            | p > 0.9999 | p = 0.9820 |            |
|          |        |          |          |        | P7DIV20  | APP.tg   | EGFP-Tau | /  | ≥4       |            |            |            | 7  | 15 ± 2.2 |                                 |            | p > 0.9999 | p = 0.9999 | p = 0.9999 |
|          |        |          |          |        |          | n.tg     | EGFP-Tau | /  | ≥4       |            |            |            | 16 | 16 ± 2.0 |                                 |            | p = 0.9995 | p = 0.9964 |            |
| P14DIV20 | n.tg   | EGFP-Tau | /        | ≥4     | 16       | 16 ± 2.0 |          |    |          |            |            |            |    |          |                                 |            |            |            |            |
|          | APP.tg | EGFP-Tau | /        | ≥4     | 20       | 17 ± 3.0 |          |    |          |            |            |            |    |          |                                 |            |            |            |            |

| Brain region | Stratum    | Spine type | Culture condition | Genotype | Construct | Treatment | Mice (n) | Dendritic segments (n) | Mean ± s.e.m | One way ANOVA<br>(Untreated both genotypes together with DAPT treated both genotypes) | Post hoc (I) p values<br>(n.tg versus APP.tg) | Post hoc (I) p values<br>(versus DAPT treated, same genotype) |                                |            |            |
|--------------|------------|------------|-------------------|----------|-----------|-----------|----------|------------------------|--------------|---------------------------------------------------------------------------------------|-----------------------------------------------|---------------------------------------------------------------|--------------------------------|------------|------------|
| CA1          | rad. + or. | Mush.      | P7DIV20           | n.tg     | EGFP-Tau  | /         | ≥4       | 10                     | 43 ± 3       | F (3,49) = 8.255<br>p = 0.0002                                                        | p = 0.2520                                    | p = 0.2807                                                    |                                |            |            |
|              |            |            |                   | APP.tg   | EGFP-Tau  | /         | ≥4       | 12                     | 32 ± 3       |                                                                                       |                                               | p = 0.0002                                                    |                                |            |            |
|              |            |            | P7DIV20           | n.tg     | EGFP-Tau  | DAPT      | ≥4       | 16                     | 53 ± 4       |                                                                                       |                                               | p = 0.9287                                                    |                                |            |            |
|              |            |            |                   | APP.tg   | EGFP-Tau  | DAPT      | ≥4       | 15                     | 56 ± 4       |                                                                                       |                                               |                                                               |                                |            |            |
|              |            |            | Stubby            | P7DIV20  | n.tg      | EGFP-Tau  | /        | ≥4                     | 10           |                                                                                       |                                               | 40 ± 4                                                        | F (3,49) = 2.600<br>p = 0.0627 | p = 0.5316 | p = 0.8042 |
|              |            |            |                   |          | APP.tg    | EGFP-Tau  | /        | ≥4                     | 12           |                                                                                       |                                               | 48 ± 4                                                        |                                |            | p = 0.0830 |
|              |            | P7DIV20    | n.tg              | EGFP-Tau | DAPT      | ≥4        | 16       | 35 ± 4                 | p > 0.9999   |                                                                                       |                                               |                                                               |                                |            |            |
|              |            |            | APP.tg            | EGFP-Tau | DAPT      | ≥4        | 15       | 35 ± 3                 |              |                                                                                       |                                               |                                                               |                                |            |            |
|              |            | Thin       | P7DIV20           | n.tg     | EGFP-Tau  | /         | ≥4       | 10                     | 16 ± 3       | F (3,49) = 1.838<br>p = 0.1526                                                        | p = 0.9512                                    | p = 0.7837                                                    |                                |            |            |
|              |            |            |                   | APP.tg   | EGFP-Tau  | /         | ≥4       | 12                     | 19 ± 2       |                                                                                       |                                               | p = 0.1514                                                    |                                |            |            |
|              |            | P7DIV20    | n.tg              | EGFP-Tau | DAPT      | ≥4        | 16       | 11 ± 4                 | p = 0.9211   |                                                                                       |                                               |                                                               |                                |            |            |
|              |            |            | APP.tg            | EGFP-Tau | DAPT      | ≥4        | 15       | 8 ± 4                  |              |                                                                                       |                                               |                                                               |                                |            |            |
| CA3          | rad. + or. | Mush.      | P7DIV20           | n.tg     | EGFP-Tau  | /         | ≥4       | 33                     | 44 ± 2       |                                                                                       |                                               | F (3,101) = 5.603<br>p = 0.0014                               | p = 0.0366                     | p = 0.8155 |            |
|              |            |            |                   | APP.tg   | EGFP-Tau  | /         | ≥4       | 40                     | 32 ± 4       |                                                                                       |                                               |                                                               |                                | p = 0.0081 |            |
|              |            |            | P7DIV20           | n.tg     | EGFP-Tau  | DAPT      | ≥4       | 16                     | 49 ± 4       | p = 0.9988                                                                            |                                               |                                                               |                                |            |            |
|              |            |            |                   | APP.tg   | EGFP-Tau  | DAPT      | ≥4       | 16                     | 50 ± 3       |                                                                                       |                                               |                                                               |                                |            |            |
|              |            |            | Stubby            | P7DIV20  | n.tg      | EGFP-Tau  | /        | ≥4                     | 33           | 43 ± 3                                                                                | F (3,101) = 6.965<br>p = 0.0003               |                                                               |                                | p = 0.0235 | p = 0.6790 |
|              |            |            |                   |          | APP.tg    | EGFP-Tau  | /        | ≥4                     | 40           | 53 ± 2                                                                                |                                               |                                                               |                                |            | p = 0.0021 |
|              |            | P7DIV20    | n.tg              | EGFP-Tau | DAPT      | ≥4        | 16       | 38 ± 4                 | p = 0.9974   |                                                                                       |                                               |                                                               |                                |            |            |
|              |            |            | APP.tg            | EGFP-Tau | DAPT      | ≥4        | 16       | 37 ± 3                 |              |                                                                                       |                                               |                                                               |                                |            |            |
|              |            | Thin       | P7DIV20           | n.tg     | EGFP-Tau  | /         | ≥4       | 33                     | 13 ± 2       | F (3,101) = 0.3395<br>p = 0.7968                                                      |                                               | p = 0.8835                                                    | p > 0.9999                     |            |            |
|              |            |            |                   | APP.tg   | EGFP-Tau  | /         | ≥4       | 40                     | 15 ± 2       |                                                                                       |                                               |                                                               | p = 0.8180                     |            |            |
|              |            | P7DIV20    | n.tg              | EGFP-Tau | DAPT      | ≥4        | 16       | 13 ± 3                 | p = 0.9949   |                                                                                       |                                               |                                                               |                                |            |            |
|              |            |            | APP.tg            | EGFP-Tau | DAPT      | ≥4        | 16       | 12 ± 2                 |              |                                                                                       |                                               |                                                               |                                |            |            |

| Brain region | Stratum | Spine type | Culture condition | Genotype | Construct | Treatment | Mice (n) | Dendritic segments (n) | Mean ± s.e.m | One way ANOVA<br>(EGFP-Tau treated both genotypes together with EGFP treated both genotypes) | Post hoc (I) p values<br>(n.tg versus APP.tg) | Post hoc (I) p values<br>(versus EGFP, same genotype) | One way ANOVA<br>(EGFP-Tau treated both genotypes together with EGFP-Tau untreated both genotypes, same culture time from Fig 2C) | Post hoc (I) p values<br>(versus EGFP-Tau untreated) |                                 |                                |            |                                |            |
|--------------|---------|------------|-------------------|----------|-----------|-----------|----------|------------------------|--------------|----------------------------------------------------------------------------------------------|-----------------------------------------------|-------------------------------------------------------|-----------------------------------------------------------------------------------------------------------------------------------|------------------------------------------------------|---------------------------------|--------------------------------|------------|--------------------------------|------------|
| CA1          | rad.    | Mush.      | P7DIV15           | n.tg     | EGFP-Tau  | EpoD      | 5        | 31                     | 38.02 ± 1.88 | F (3,83) = 1.124<br>p = 0.3442                                                               | p = 0.8412                                    | p = 0.9767                                            | F (3,73) = 4.960<br>p = 0.0035                                                                                                    | p = 0.0075                                           |                                 |                                |            |                                |            |
|              |         |            |                   | APP.tg   | EGFP-Tau  | EpoD      | 5        | 18                     | 35.68 ± 2.46 |                                                                                              |                                               | p = 0.8634                                            |                                                                                                                                   | p = 0.5069                                           |                                 |                                |            |                                |            |
|              |         |            |                   | n.tg     | EGFP      | EpoD      | 5        | 13                     | 36.73 ± 2.21 |                                                                                              |                                               | p = 0.7342                                            |                                                                                                                                   |                                                      |                                 |                                |            |                                |            |
|              |         |            |                   | APP.tg   | EGFP      | EpoD      | 6        | 25                     | 33.38 ± 1.66 |                                                                                              |                                               |                                                       |                                                                                                                                   |                                                      |                                 |                                |            |                                |            |
|              |         |            |                   | Stubby   | P7DIV15   | n.tg      | EGFP-Tau | EpoD                   | 5            |                                                                                              |                                               | 31                                                    |                                                                                                                                   | 36.76 ± 1.86                                         | F (3,83) = 0.6276<br>p = 0.5992 | p = 0.9763                     | p = 0.9819 | F (3,73) = 2.028<br>p = 0.1174 | p = 0.9859 |
|              |         |            |                   |          |           | APP.tg    | EGFP-Tau | EpoD                   | 5            |                                                                                              |                                               | 18                                                    |                                                                                                                                   | 38.01 ± 2.08                                         |                                 |                                | p = 0.9465 |                                | p = 0.2669 |
|              |         | P7DIV15    | n.tg              | EGFP     | EpoD      | 5         | 13       | 35.50 ± 1.77           | p = 0.6186   |                                                                                              |                                               |                                                       |                                                                                                                                   |                                                      |                                 |                                |            |                                |            |
|              |         |            | APP.tg            | EGFP     | EpoD      | 6         | 25       | 39.75 ± 2.48           |              |                                                                                              |                                               |                                                       |                                                                                                                                   |                                                      |                                 |                                |            |                                |            |
|              |         | Thin       | P7DIV15           | n.tg     | EGFP-Tau  | EpoD      | 5        | 31                     | 25.22 ± 1.46 | F (3,83) = 0.4465<br>p = 0.7204                                                              | p = 0.9583                                    | p = 0.7191                                            | F (3,73) = 14.060<br>p < 0.0001                                                                                                   | p < 0.0001                                           |                                 |                                |            |                                |            |
|              |         |            |                   | APP.tg   | EGFP-Tau  | EpoD      | 5        | 18                     | 26.32 ± 1.78 |                                                                                              |                                               | p = 0.9951                                            |                                                                                                                                   | p = 0.0003                                           |                                 |                                |            |                                |            |
|              |         | P7DIV15    | n.tg              | EGFP     | EpoD      | 5         | 13       | 27.79 ± 1.64           | p = 0.9834   |                                                                                              |                                               |                                                       |                                                                                                                                   |                                                      |                                 |                                |            |                                |            |
|              |         |            | APP.tg            | EGFP     | EpoD      | 6         | 25       | 26.87 ± 1.39           |              |                                                                                              |                                               |                                                       |                                                                                                                                   |                                                      |                                 |                                |            |                                |            |
| CA3          | rad.    | Mush.      | P7DIV15           | n.tg     | EGFP-Tau  | EpoD      | 5        | 18                     | 37.33 ± 2.51 |                                                                                              |                                               | F (3,79) = 3.845<br>p = 0.0127                        |                                                                                                                                   | p = 0.9605                                           | p = 0.0180                      | F (3,61) = 4.160<br>p = 0.0095 | p = 0.0333 |                                |            |
|              |         |            |                   | APP.tg   | EGFP-Tau  | EpoD      | 5        | 21                     | 35.34 ± 3.23 |                                                                                              |                                               |                                                       |                                                                                                                                   |                                                      | p = 0.4885                      |                                | p = 0.7675 |                                |            |
|              |         |            |                   | n.tg     | EGFP      | EpoD      | 5        | 22                     | 25.30 ± 1.96 | p = 0.6234                                                                                   |                                               |                                                       |                                                                                                                                   |                                                      |                                 |                                |            |                                |            |
|              |         |            |                   | APP.tg   | EGFP      | EpoD      | 5        | 22                     | 29.88 ± 3.08 |                                                                                              |                                               |                                                       |                                                                                                                                   |                                                      |                                 |                                |            |                                |            |
|              |         |            |                   | Stubby   | P7DIV15   | n.tg      | EGFP-Tau | EpoD                   | 5            | 18                                                                                           | 36.66 ± 2.68                                  |                                                       | F (3,79) = 3.992<br>p = 0.0106                                                                                                    |                                                      | p = 0.2036                      |                                | p = 0.0056 | F (3,61) = 2.536<br>p = 0.0650 | p = 0.9927 |
|              |         |            |                   |          |           | APP.tg    | EGFP-Tau | EpoD                   | 5            | 21                                                                                           | 45.02 ± 3.29                                  |                                                       |                                                                                                                                   |                                                      |                                 |                                | p = 0.9417 |                                | p = 0.8691 |
|              |         | P7DIV15    | n.tg              | EGFP     | EpoD      | 5         | 22       | 50.88 ± 2.51           | p = 0.1777   |                                                                                              |                                               |                                                       |                                                                                                                                   |                                                      |                                 |                                |            |                                |            |
|              |         |            | APP.tg            | EGFP     | EpoD      | 5         | 22       | 42.75 ± 2.92           |              |                                                                                              |                                               |                                                       |                                                                                                                                   |                                                      |                                 |                                |            |                                |            |
|              |         | Thin       | P7DIV15           | n.tg     | EGFP-Tau  | EpoD      | 5        | 18                     | 26.01 ± 1.69 | F (3,79) = 3.630<br>p = 0.0164                                                               | p = 0.0780                                    | p = 0.8315                                            |                                                                                                                                   | F (3,61) = 13.490<br>p < 0.0001                      |                                 | p < 0.0001                     |            |                                |            |
|              |         |            |                   | APP.tg   | EGFP-Tau  | EpoD      | 5        | 21                     | 19.64 ± 1.63 |                                                                                              |                                               | p = 0.0133                                            |                                                                                                                                   |                                                      |                                 | p = 0.0078                     |            |                                |            |
|              |         | P7DIV15    | n.tg              | EGFP     | EpoD      | 5         | 22       | 23.82 ± 1.86           | p = 0.4735   |                                                                                              |                                               |                                                       |                                                                                                                                   |                                                      |                                 |                                |            |                                |            |
|              |         |            |                   |          |           |           |          |                        |              |                                                                                              |                                               |                                                       |                                                                                                                                   |                                                      |                                 |                                |            |                                |            |



|              |            |            |                   |          |           |            |          |                        |              | p = 0.0000                                                                                                 |                                            |                                                                 |
|--------------|------------|------------|-------------------|----------|-----------|------------|----------|------------------------|--------------|------------------------------------------------------------------------------------------------------------|--------------------------------------------|-----------------------------------------------------------------|
| Brain region | Stratum    | Spine type | Culture condition | Genotype | Construct | Treatment  | Mice (n) | Dendritic segments (n) | Mean ± s.e.m | One way ANOVA (EGFP-Tau treated both genotypes together with untreated P7DIV20 both genotypes from Fig.3E) | Post hoc (I) p values (n.tg versus APP.tg) | Post hoc (I) p values (versus untreated P7DIV20, same genotype) |
| CA1          | rad. + or. | Mush.      | P7DIV20           | n.tg     | EGFP-Tau  | Nocodazole | 3        | 25                     | 49.60 ± 2.38 | <b>F (3,89) = 7.824</b><br><b>p = 0.0001</b>                                                               | p = 0.0329                                 | p = 0.0922                                                      |
|              |            |            |                   | APP.tg   | EGFP-Tau  | Nocodazole | 4        | 46                     | 44.02 ± 1.42 |                                                                                                            |                                            | p = 0.0006                                                      |
|              |            | Stubby     | P7DIV20           | n.tg     | EGFP-Tau  | Nocodazole | 3        | 25                     | 39.32 ± 2.69 | F (3,89) = 1.536<br>p = 0.2108                                                                             | p = 0.4133                                 | p = 0.8784                                                      |
|              |            |            |                   | APP.tg   | EGFP-Tau  | Nocodazole | 4        | 46                     | 41.74 ± 1.49 |                                                                                                            |                                            | p = 0.1067                                                      |
|              |            | Thin       | P7DIV20           | n.tg     | EGFP-Tau  | Nocodazole | 3        | 25                     | 11.20 ± 0.95 | <b>F (3,89) = 3.484</b><br><b>p = 0.0191</b>                                                               | p = 0.0863                                 | p = 0.0761                                                      |
|              |            |            |                   | APP.tg   | EGFP-Tau  | Nocodazole | 4        | 46                     | 14.28 ± 1.40 |                                                                                                            |                                            | p = 0.0446                                                      |
| Brain region | Stratum    | Spine type | Culture condition | Genotype | Construct | Treatment  | Mice (n) | Dendritic segments (n) | Mean ± s.e.m | One way ANOVA (EpoD treated both genotypes together with untreated P7DIV20 both genotypes from Fig.2C)     | Post hoc (I) p values (n.tg versus APP.tg) | Post hoc (I) p values (versus untreated P7DIV20, same genotype) |
| CA1          | rad.       | Mush.      | P7DIV20           | n.tg     | EGFP-Tau  | EpoD       | 7        | 16                     | 33.15 ± 2.86 | <b>F (3,54) = 3.032</b><br><b>p = 0.0370</b>                                                               | p = 0.9792                                 | p = 0.0468                                                      |
|              |            |            |                   | APP.tg   | EGFP-Tau  | EpoD       | 7        | 19                     | 34.91 ± 2.35 |                                                                                                            |                                            | p = 0.9793                                                      |
|              |            | Stubby     | P7DIV20           | n.tg     | EGFP-Tau  | EpoD       | 7        | 16                     | 40.01 ± 2.36 | <b>F (3,54) = 3.036</b><br><b>p = 0.0368</b>                                                               | p = 0.9853                                 | p = 0.9955                                                      |
|              |            |            |                   | APP.tg   | EGFP-Tau  | EpoD       | 7        | 19                     | 38.70 ± 1.57 |                                                                                                            |                                            | p = 0.0379                                                      |
|              |            | Thin       | P7DIV20           | n.tg     | EGFP-Tau  | EpoD       | 7        | 16                     | 26.84 ± 2.29 | <b>F (3,54) = 9.302</b><br><b>p &lt; 0.0001</b>                                                            | p = 0.9984                                 | p = 0.0007                                                      |
|              |            |            |                   | APP.tg   | EGFP-Tau  | EpoD       | 7        | 19                     | 26.40 ± 1.82 |                                                                                                            |                                            | p = 0.0112                                                      |
|              | or.        | Mush.      | P7DIV20           | n.tg     | EGFP-Tau  | EpoD       | 7        | 14                     | 30.89 ± 2.62 | F (3,42) = 0.7877<br>p = 0.5076                                                                            | p = 0.9790                                 | p = 0.4798                                                      |
|              |            |            |                   | APP.tg   | EGFP-Tau  | EpoD       | 7        | 17                     | 32.47 ± 2.43 |                                                                                                            |                                            | p = 0.9910                                                      |
|              |            | Stubby     | P7DIV20           | n.tg     | EGFP-Tau  | EpoD       | 7        | 14                     | 44.20 ± 2.99 | F (3,42) = 0.2330<br>p = 0.8728                                                                            | p = 0.9043                                 | p = 0.9954                                                      |
|              |            |            |                   | APP.tg   | EGFP-Tau  | EpoD       | 7        | 17                     | 41.37 ± 2.24 |                                                                                                            |                                            | p = 0.8963                                                      |
|              |            | Thin       | P7DIV20           | n.tg     | EGFP-Tau  | EpoD       | 7        | 14                     | 24.91 ± 1.73 | <b>F (3,42) = 3.460</b><br><b>p = 0.0246</b>                                                               | p = 0.9395                                 | p = 0.0622                                                      |
|              |            |            |                   | APP.tg   | EGFP-Tau  | EpoD       | 7        | 17                     | 26.16 ± 1.48 |                                                                                                            |                                            | p = 0.8558                                                      |
| CA3          | rad.       | Mush.      | P7DIV20           | n.tg     | EGFP-Tau  | EpoD       | 6        | 20                     | 31.34 ± 1.51 | <b>F (3,81) = 11.17</b><br><b>p &lt; 0.0001</b>                                                            | p = 0.9889                                 | p = 0.0002                                                      |
|              |            |            |                   | APP.tg   | EGFP-Tau  | EpoD       | 5        | 21                     | 30.32 ± 2.48 |                                                                                                            |                                            | p = 0.9996                                                      |
|              |            | Stubby     | P7DIV20           | n.tg     | EGFP-Tau  | EpoD       | 6        | 20                     | 48.28 ± 1.98 | <b>F (3,81) = 6.514</b><br><b>p = 0.0005</b>                                                               | p = 0.4080                                 | p = 0.2275                                                      |
|              |            |            |                   | APP.tg   | EGFP-Tau  | EpoD       | 5        | 21                     | 42.52 ± 2.29 |                                                                                                            |                                            | p = 0.0034                                                      |
|              |            | Thin       | P7DIV20           | n.tg     | EGFP-Tau  | EpoD       | 6        | 20                     | 20.38 ± 1.51 | <b>F (3,81) = 13.33</b><br><b>p &lt; 0.0001</b>                                                            | p = 0.0375                                 | p = 0.0242                                                      |
|              |            |            |                   | APP.tg   | EGFP-Tau  | EpoD       | 5        | 21                     | 27.17 ± 1.73 |                                                                                                            |                                            | p < 0.0001                                                      |
|              | or.        | Mush.      | P7DIV20           | n.tg     | EGFP-Tau  | EpoD       | 6        | 10                     | 25.14 ± 2.09 | <b>F (3,32) = 11.18</b><br><b>p &lt; 0.0001</b>                                                            | p = 0.7787                                 | p = 0.0016                                                      |
|              |            |            |                   | APP.tg   | EGFP-Tau  | EpoD       | 5        | 11                     | 21.94 ± 2.72 |                                                                                                            |                                            | p = 0.0035                                                      |
|              |            | Stubby     | P7DIV20           | n.tg     | EGFP-Tau  | EpoD       | 6        | 10                     | 52.46 ± 3.36 | F (3,32) = 1.380<br>p = 0.2665                                                                             | p = 0.9995                                 | p = 0.2827                                                      |
|              |            |            |                   | APP.tg   | EGFP-Tau  | EpoD       | 5        | 11                     | 52.00 ± 3.41 |                                                                                                            |                                            | p = 0.9205                                                      |
|              |            | Thin       | P7DIV20           | n.tg     | EGFP-Tau  | EpoD       | 6        | 10                     | 22.40 ± 2.59 | <b>F (3,32) = 6.929</b><br><b>p = 0.0010</b>                                                               | p = 0.5538                                 | p = 0.0844                                                      |
|              |            |            |                   | APP.tg   | EGFP-Tau  | EpoD       | 5        | 11                     | 26.06 ± 1.85 |                                                                                                            |                                            | p = 0.0053                                                      |

(I) Tukey's multiple comparisons test  
rad. stratum radiatum (APICAL DENDRITES)  
or. stratum oriens (BASAL DENDRITES)
